# Supplementary material for: Application of response surface methodology towards the development of a phenylethanoid-based silver nanoparticle with multifaceted biological properties
Source: Royal Society of Chemistry journal article supplement (doi:10.1039/d4nj02806f), 2024-12-20
Supplement: d4nj02806f1.pdf [file d4nj02806f1.pdf]

## SUPPORTING INFORMATION

### APPLICATION OF RESPONSE SURFACE METHODOLOGY TOWARDS THE DEVELOPMENT OF PHENYLETHANOID-BASED NANOPARTICLE TARGETING MULTIFACETED BIOLOGICAL PROPERTIES

*Rajdeep Saha, Biswatrish Sarkar\**

*Group Polyphenol-BIT, Department of Pharmaceutical Sciences and Technology, Birla Institute of Technology, Mesra, Ranchi, Jharkhand 835215.*

**Table S1- BBD matrix for different factors or independent variables**

| <b>Run</b> | <b>Factor A:<br/>Concentration of<br/>AgNO<sub>3</sub><br/>(mM)</b> | <b>Factor B:<br/>Concentration of Vb<br/>(mM)</b> | <b>Factor C: pH<br/>(Mol/L of H<sup>+</sup> ions)</b> |
|------------|---------------------------------------------------------------------|---------------------------------------------------|-------------------------------------------------------|
| 1          | 3                                                                   | 5                                                 | 10                                                    |
| 2          | 5                                                                   | 3                                                 | 10                                                    |
| 3          | 5                                                                   | 3                                                 | 4                                                     |
| 4          | 1                                                                   | 5                                                 | 7                                                     |
| 5          | 1                                                                   | 3                                                 | 4                                                     |
| 6          | 3                                                                   | 3                                                 | 7                                                     |
| 7          | 3                                                                   | 1                                                 | 4                                                     |
| 8          | 3                                                                   | 1                                                 | 10                                                    |
| 9          | 1                                                                   | 3                                                 | 10                                                    |
| 10         | 5                                                                   | 1                                                 | 7                                                     |
| 11         | 5                                                                   | 5                                                 | 7                                                     |
| 12         | 3                                                                   | 3                                                 | 7                                                     |
| 13         | 3                                                                   | 5                                                 | 4                                                     |
| 14         | 3                                                                   | 3                                                 | 7                                                     |
| 15         | 1                                                                   | 1                                                 | 7                                                     |

**Table S2- ANOVA analysis for the quadratic equation**

| Source                                              | Sum of Squares | df | Mean Square | F-value | p-value |                 |
|-----------------------------------------------------|----------------|----|-------------|---------|---------|-----------------|
| <b>Model</b>                                        | 25009.10       | 5  | 5001.82     | 593.17  | <0.0001 | Significant     |
| <b>A:<br/>Concentration<br/>of AgNO<sub>3</sub></b> | 53.04          | 1  | 53.04       | 6.29    | 0.0334  |                 |
| <b>B:<br/>Concentration<br/>of Vb</b>               | 488.28         | 1  | 488.28      | 57.91   | <0.0001 |                 |
| <b>C: pH</b>                                        | 22039.50       | 1  | 22039.50    | 2613.68 | <0.0001 |                 |
| <b>BC</b>                                           | 992.25         | 1  | 992.25      | 117.67  | <0.0001 |                 |
| <b>C<sup>2</sup></b>                                | 1436.03        | 1  | 1436.03     | 170.30  | <0.0001 |                 |
| <b>Residual</b>                                     | 75.89          | 9  | 8.43        |         |         |                 |
| <b>Lack of Fit</b>                                  | 67.89          | 7  | 9.70        | 2.42    | 0.3229  | Not significant |
| <b>Pure Error</b>                                   | 8.00           | 2  | 4.00        |         |         |                 |
| <b>Cor Total</b>                                    | 25085.00       | 12 |             |         |         |                 |

**Table S3- Fit statistics for the quadratic model**

|                  |             |                                |               |
|------------------|-------------|--------------------------------|---------------|
| <b>Std. Dev.</b> | <b>2.90</b> | <b>R<sup>2</sup></b>           | <b>0.9970</b> |
| <b>Mean</b>      | 103.36      | <b>Adjusted R<sup>2</sup></b>  | 0.9953        |
| <b>C. V. %</b>   | 2.81        | <b>Predicted R<sup>2</sup></b> | 0.9902        |
|                  |             | <b>Adeq Precision</b>          | 74.3102       |

**Table S4- UV-Vis spectroscopic analysis of the different trials of Verbascoside reduced silver nanoparticles**

| <b>Trial Number</b> | <b>Factor A:<br/>Concentration<br/>of AgNO<sub>3</sub><br/>(mM)</b> | <b>Factor B:<br/>Concentration<br/>of Vb<br/>(mM)</b> | <b>Factor C: pH<br/>(Mol/L of H<sup>+</sup><br/>ions)</b> | <b>SPR band (nm)</b> |
|---------------------|---------------------------------------------------------------------|-------------------------------------------------------|-----------------------------------------------------------|----------------------|
| 1                   | 3                                                                   | 5                                                     | 10                                                        | 415                  |
| 2                   | 5                                                                   | 3                                                     | 10                                                        | 416                  |
| 3                   | 5                                                                   | 3                                                     | 4                                                         | -                    |
| 4                   | 1                                                                   | 5                                                     | 7                                                         | 458                  |
| 5                   | 1                                                                   | 3                                                     | 4                                                         | -                    |
| 6                   | 3                                                                   | 3                                                     | 7                                                         | 444                  |
| 7                   | 3                                                                   | 1                                                     | 4                                                         | -                    |
| 8                   | 3                                                                   | 1                                                     | 10                                                        | 415                  |
| 9                   | 1                                                                   | 3                                                     | 10                                                        | 420                  |
| 10                  | 5                                                                   | 1                                                     | 7                                                         | 457                  |
| 11                  | 5                                                                   | 5                                                     | 7                                                         | 462                  |
| 12                  | 3                                                                   | 3                                                     | 7                                                         | 443                  |
| 13                  | 3                                                                   | 5                                                     | 4                                                         | -                    |
| 14                  | 3                                                                   | 3                                                     | 7                                                         | 434                  |
| 15                  | 1                                                                   | 1                                                     | 7                                                         | 459                  |

**Table S5 – Zeta Potential of Verbascoside-derived silver nanoparticles at different pH**

| Trial Number | pH<br>(Mol/L of H <sup>+</sup> ions) | Zeta Potential (mV) |
|--------------|--------------------------------------|---------------------|
| 1            | 10                                   | -32.70 ±4.90        |
| 2            | 7                                    | -22.40 ±5.20        |
| 3            | 4                                    | -8.13 ±3.74         |

**Table S6- Peaks obtained from FTIR analysis and their corresponding functional groups for Verbascoside and verbascoside-derived silver nanoparticles**

| Vb                             |                                                                                                                 | VbAgNP                         |                                                           |
|--------------------------------|-----------------------------------------------------------------------------------------------------------------|--------------------------------|-----------------------------------------------------------|
| Wavenumber (cm <sup>-1</sup> ) | Functional Group                                                                                                | Wavenumber (cm <sup>-1</sup> ) | Functional Group                                          |
| 3317.83                        | Stretching –OH and the presence of phenolic groups                                                              | 3244.87                        | -OH stretching due to the presence of alcohols or phenols |
| 2924.76                        | Medium strength band shows the presence of aldehyde where the C-H bond contains a <i>sp</i> <sup>2</sup> carbon | 2919.29                        | Due to the presence of C-H bond stretching                |
| 2856.36                        | C-H stretch shows the presence of alkenes                                                                       | 1691.75                        | C=O bond stretching                                       |
| 1697.22                        | Medium band shows the presence of C=C bond stretching vibration and shows the presence of an aromatic group     | 1602.37                        | C=C stretching                                            |

|         |                                             |                                                        |
|---------|---------------------------------------------|--------------------------------------------------------|
| 1440.04 | OH bending from 1518.47<br>carboxylic group | C=C stretching<br>within an aromatic<br>ring (benzene) |
|---------|---------------------------------------------|--------------------------------------------------------|

**Table S7 – Stability Study of Verbascoside reduced silver nanoparticles**

| <b>Time</b> | <b>Average Particle Size (nm)</b> | <b>Zeta Potential (mV)</b> | <b>Poly Dispersity Index</b> |
|-------------|-----------------------------------|----------------------------|------------------------------|
| 0 month     | 51.79                             | -35.50                     | 0.16                         |
| 6 months    | 119.90                            | -19.10                     | 0.29                         |
| 12 months   | 182.20                            | -12.30                     | 0.41                         |
